# Supplementary material for: Second primary colorectal cancer in adults: a SEER analysis of incidence and outcomes
Source: Springer Nature journal article supplement (doi:10.1186/s12876-023-02893-2), 2023-07-26

Supplementary Figure 1 The initial primary tumor sites of spCRC patients.

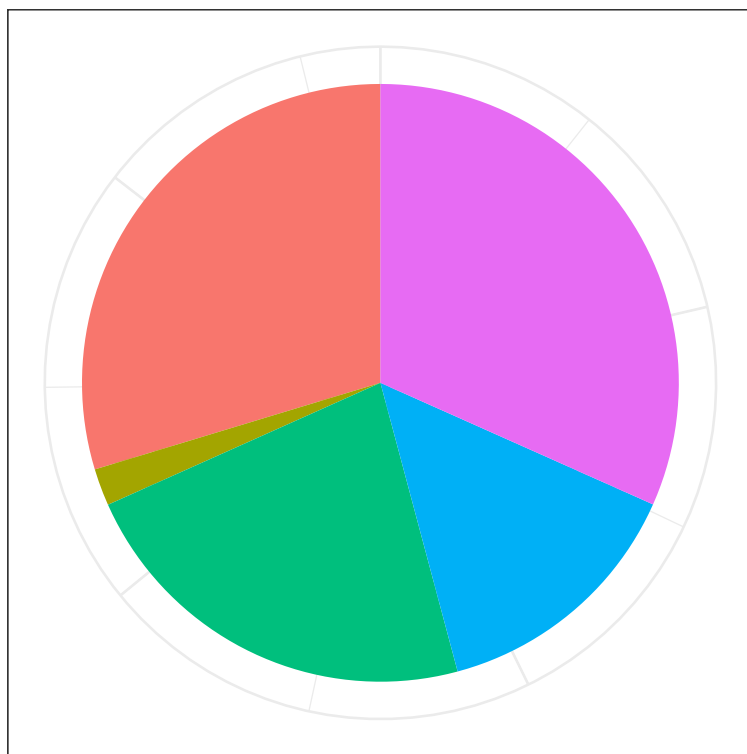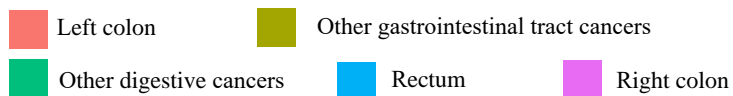

Supplement: MOESM1 [file 25849708]
